# Supplementary material
Source: PubMed Central journal article supplement (PMC3093973)

## SUPPLEMENTAL DATA

for

### **Global deficits in development, function, and gene expression in the endocrine pancreas in a deletion mouse model of Prader-Willi syndrome**

**Mihaela Stefan,<sup>1,3</sup> Rebecca A. Simmons,<sup>4</sup> Suzanne Bertera,<sup>2</sup> Massimo Trucco,<sup>2,3</sup>**

**Farzad Esni,<sup>5</sup> Peter Drain,<sup>6</sup> Robert D. Nicholls<sup>1,3,7</sup>**

<sup>1</sup> Birth Defects Laboratories, Division of Medical Genetics, and <sup>2</sup> Division of Immunogenetics, Department of Pediatrics, Children's Hospital of Pittsburgh of UPMC, University of Pittsburgh School of Medicine, 4401 Penn Avenue, Pittsburgh, PA 15224; <sup>3</sup> Department of Human Genetics, University of Pittsburgh School of Public Health, Pittsburgh, PA 15213; <sup>4</sup> Department of Pediatrics, Children's Hospital of Philadelphia and University of Pennsylvania, Philadelphia, PA 19104; <sup>5</sup> Department of Surgery, University of Pittsburgh School of Medicine, Pittsburgh, PA 15213; <sup>6</sup> Department of Cell Biology and Physiology, University of Pittsburgh School of Medicine, Pittsburgh, PA 15213.

<sup>7</sup> Correspondence should be addressed to Dr. Robert D. Nicholls at:  
Department of Pediatrics, Children's Hospital of Pittsburgh of UPMC,  
Rangos Research Building, 4401 Penn Avenue, Pittsburgh, PA 15224;  
Phone: (412) 692-7855; Fax: (412) 692-7816; e-mail <[robert.nicholls@chp.edu](mailto:robert.nicholls@chp.edu)>

**The Supplemental Data for this manuscript contains one Figure and three Tables (one in a separate Excel file).**

## TABLES, SUPPLEMENTAL DATA

**Table S1. PCR primers to examine gene expression in pancreas and NIT-1 insulinoma cells**  
(page 3).

**Table S2. Genes deregulated in TgPWS vs. WT pancreas at P1 by microarray** (pages 4-6).

**Table S3. PancChip 5.0 microarray data for TgPWS vs. WT pancreas at P1** (see separate Excel file, 3.88 MB).

## FIGURE LEGEND, SUPPLEMENTAL DATA (see page 7 for Figure S1)

**Figure S1. Analysis of apoptosis and replication rate for  $\beta$ -cells in TgPWS compared with WT controls.** **A:** evaluation of  $\beta$ -cell apoptosis in pancreas sections of TgPWS and WT mice at E17.5 and P1 by immunostaining of activated caspase-3 (red) and insulin (green). Arrows indicate doubly-stained  $\beta$ -cells. Cell nuclei were stained with DAPI (blue). See Fig. 5D for quantitative analysis of  $\beta$ -cell apoptosis data. **B:** evaluation of replication of  $\beta$ -cells by assessment of BrdU incorporation in TgPWS and control pancreas at E17.5. Arrows indicate proliferative  $\beta$ -cells. **C:** quantification of BrdU labeled  $\beta$ -cells in TgPWS and control islets. Values represent means  $\pm$  SE of percentage of BrdU positive cells normalized to insulin positive cells from three animals of each genotype;  $P = 0.90$ .

**Table S1. PCR primers to examine gene expression in pancreas and NIT-1 insulinoma cells.**

| PCR primer name <sup>a</sup> | Gene <sup>b</sup>          | PCR primer sequence               |
|------------------------------|----------------------------|-----------------------------------|
| RN2318 F                     | <i>Polr2a</i> <sup>c</sup> | 5' -ACTCCTTCACTCACTGTCTTCCTGTT-3' |
| RN2319 R                     | <i>Polr2a</i> <sup>c</sup> | 5' -TCCTGATCTTCTGCCACCACTGT-3'    |
| RN2530 F                     | <i>Ins2</i> <sup>d</sup>   | 5' -AAAACCATCAGCAAGCAGGAA-3'      |
| RN2531 R                     | <i>Ins2</i> <sup>d</sup>   | 5' -CATCCACAGGGCCATGTTG-3'        |
| RN1331 F                     | <i>Frat3</i>               | 5' -CTGGCGATTGTGATGGAGGG-3'       |
| RN1332 R                     | <i>Frat3</i>               | 5' -GAAGTCCTGCT GACAGCCTG-3'      |
| RN2353 F                     | <i>Mkrn3</i>               | 5' -CTCCTCTGGCTTTGTCATTCTTA-3'    |
| RN2354 R                     | <i>Mkrn3</i>               | 5' -GCACGCTTCTGGCTCATCC-3'        |
| RN2351 F                     | <i>Magel2</i>              | 5' -ATCCGAGAATACAAAGACGACAGC-3'   |
| RN2352 R                     | <i>Magel2</i>              | 5' -TGACGATGATGTAAGTGTGGGTTT-3'   |
| RN2320 F                     | <i>Ndn</i>                 | 5' -GCTGTGTAAGGGTGGGGTTGA-3'      |
| RN2321 R                     | <i>Ndn</i>                 | 5' -GCACTGTGGATTTGGGATACTCTAA-3'  |
| RN2355 F                     | <i>Mirh1</i>               | 5' -AAATGACTCTGGAATAATAATCTGA-3'  |
| RN2356 R                     | <i>Mirh1</i>               | 5' -TAAGAGCCTTAGAAATACACAGTCT-3'  |
| RN2324 F                     | <i>U1A</i>                 | 5' -TAGGAGTTGTCAGCAAGGCAAT-3'     |
| RN2325 R                     | <i>U1A-Snurfl-Snrpn</i>    | 5' -CAGTAGTTCTTCTCAAGTGAAGCGAT-3' |
| RN3062 F                     | <i>Snurfl-Snrpn</i>        | 5' -TTGGTTCTGAGGAGTGATTTGC-3'     |
| RN2325 R                     | <i>Snurfl-Snrpn</i>        | 5' -CAGTAGTTCTTCTCAAGTGAAGCGAT-3' |
| RN3278 F                     | <i>Snord107</i>            | 5' -CGGAGACCTTGACTGGATTT-3'       |
| RN3279 R                     | <i>Snord107</i>            | 5' -GTGAGGCACATTGACTAGAT-3'       |
| RN3280 F                     | <i>Snord64</i>             | 5' -GGCTGGACTTATGATGAGCTA-3'      |
| RN3281 R                     | <i>Snord64</i>             | 5' -CTTCAGAGTAATCATTGAGC-3'       |
| RN3282 F                     | <i>Snord116</i>            | 5' -GGATCTATGATGATTCCCAG-3'       |
| RN3283 R                     | <i>Snord116</i>            | 5' -GGACCTCAGTCCGATGAGA-3'        |
| RN3284 F                     | <i>Snord115</i>            | 5' -GGGTCAATGATGACAACCCA-3'       |
| RN3285 R                     | <i>Snord115</i>            | 5' -GGCCTCAGCGTAATCCTATT-3'       |

<sup>a</sup> F, forward primer; R, reverse primer. <sup>b</sup> Blue, paternally expressed imprinted gene within mouse chromosome 7C.

<sup>c</sup> Control gene for RNA amount. <sup>d</sup> Control gene for pancreatic  $\beta$ -cells.

**Table S2. Genes deregulated in TgPWS vs. WT pancreas at P1 by microarray<sup>a</sup>.**

| Gene Name            | Fold change | P value | PaGE confidence | QRT-PCR confirmation | NCBI Reference Sequence | Mouse chromosome location [position in Mb and strand] |
|----------------------|-------------|---------|-----------------|----------------------|-------------------------|-------------------------------------------------------|
| <i>Ndn</i>           | -3.62       | 0.006   | 0.81            | Yes <sup>b</sup>     | NM_010882               | 7 [69,493,163-69,494,814 F]                           |
| <i>Hspa9a</i>        | -1.71       | 0.004   | 0.94            | No                   | NM_010481               | 18 [35,097,293-35,113,998 R]                          |
| <i>Sfrs10</i>        | -1.55       | 0.018   | 0.94            | -                    | NM_009186               | 16 [22,246,442-22,265,994 R]                          |
| <i>Iapp</i> (2)      | 3.32        | 0.038   | 0.83            | Yes                  | NM_010491               | 6 [142,246,948-142,252,337 F]                         |
| <i>Sgne1</i> (3)     | 2.89        | 0.030   | 0.85            | Yes                  | NM_009162               | 2 [113,616,705-113,669,196 R]                         |
| <i>Sst</i> (2)       | 2.87        | 0.036   | 0.83            | Yes                  | NM_009215               | 16 [23,889,670-23,890,930 R]                          |
| <i>Ppy</i> (2)       | 2.82        | 0.019   | 0.90            | Yes                  | NM_008918               | 11 [101,961,245-101,962,633 R]                        |
| <i>Tmem27</i>        | 2.72        | 0.011   | 0.89            | Yes                  | NM_020626               | X [160,526,762-160,556,792 F]                         |
| <i>Mt1</i>           | 2.68        | 0.015   | 0.85            | -                    | NM_013602               | 8 [96,703,141-96,704,225 F]                           |
| <i>Tor2a</i>         | 2.62        | 0.041   | 0.83            | -                    | NM_152800               | 2 [32,612,811-32,617,756 F]                           |
| <i>Arl7</i>          | 2.54        | 0.028   | 0.84            | -                    | NM_177305               | 1 [90,569,702-90,598,451 R]                           |
| <i>Fabp4</i> (2)     | 2.49        | 0.023   | 0.86            | -                    | NM_024406               | 3 [10,204,347-10,208,576 R]                           |
| <i>Ins1</i> (3)      | 2.49        | 0.031   | 0.83            | -                    | NM_008386               | 19 [52,338,939-52,339,497 F]                          |
| <i>Neat1</i>         | 2.47        | 0.008   | 0.86            | -                    | NR_003513               | 19 [5,842,302-5,845,478 F]                            |
| <i>Ins2</i> (4)      | 2.46        | 0.029   | 0.82            | Yes                  | NM_008387               | 7 [149,864,561-149,885,415 R]                         |
| <i>Gtl2/Meg3</i> (7) | 2.44        | 0.003   | 0.86            | -                    | NM_144513               | 12 [110,784,505-110,809,929 F]                        |
| <i>Zscan18</i>       | 2.39        | 0.034   | 0.83            | -                    | NM_001017955            | 7 [13,353,442-13,357,393 R]                           |
| <i>Elac2</i>         | 2.35        | 0.015   | 0.84            | -                    | NM_023479               | 11 [64,792,537-64,815,578 F]                          |
| <i>Camk2n1</i>       | 2.30        | 0.023   | 0.83            | -                    | NM_025451               | 4 [138,011,101-138,014,058 F]                         |
| <i>Fzd9</i>          | 2.28        | 0.029   | 0.86            | -                    | XM_284144               | 5 [135,724,808-135,727,100 R]                         |
| <i>Rtn4</i>          | 2.22        | 0.031   | 0.83            | -                    | NM_024226               | 11 [29,592,938-29,642,916 F]                          |
| <i>Tbcd</i>          | 2.21        | 0.019   | 0.90            | -                    | NM_029878               | 11 [121,313,261-121,478,477 F]                        |
| <i>Rras2</i>         | 2.13        | 0.006   | 0.87            | -                    | NM_025846               | 7 [121,190,302-121,261,295 R]                         |
| <i>Penk1</i> (2)     | 2.11        | 0.026   | 0.85            | -                    | NM_001002927            | 4 [4,060,684-4,065,935 R]                             |
| <i>Coll1a1</i> (2)   | 2.08        | 0.006   | 0.90            | -                    | NM_007742               | 11 [94,797,567-94,813,201 F]                          |
| <i>Pyy</i>           | 1.90        | 0.030   | 0.82            | -                    | NM_145435               | 11 [101,967,994-101,969,146 R]                        |
| <i>Pim3</i>          | 1.90        | 0.017   | 0.84            | -                    | NM_145478               | 15 [88,692,905-88,696,148 F]                          |

|                         |      |       |      |     |              |                                |
|-------------------------|------|-------|------|-----|--------------|--------------------------------|
| <i>Bicc1</i>            | 1.84 | 0.019 | 0.84 | -   | NM_031397    | 10 [70,387,850-70,622,438 R]   |
| <i>Gabarapl1</i>        | 1.83 | 0.047 | 0.82 | -   | NM_020590    | 6 [129,483,218-129,492,349 F]  |
| <i>Igfbp6</i>           | 1.82 | 0.036 | 0.90 | -   | NM_008344    | 15 [101,974,793-101,979,942 F] |
| <i>Isl1</i>             | 1.80 | 0.024 | 0.86 | Yes | NM_021459    | 13 [117,088,489-117,099,896 R] |
| <i>Ngfr</i>             | 1.76 | 0.041 | 0.82 | -   | NM_033217    | 11 [95,430,142-95,449,012 R]   |
| <i>Nfib</i>             | 1.72 | 0.044 | 0.82 | -   | NM_001113209 | 4 [81,941,952-82,351,493 R]    |
| <i>Ctrl</i>             | 1.72 | 0.027 | 0.83 | -   | NM_023182    | 8 [108,455,900-108,457,747 R]  |
| <i>Tmem45a</i>          | 1.71 | 0.018 | 0.82 | -   | NM_019631    | 16 [56,806,382-56,886,279 R]   |
| <i>Wfdc15b</i>          | 1.66 | 0.011 | 0.86 | -   | NM_138685    | 2 [164,040,190-164,047,399 R]  |
| <i>Mapre3</i>           | 1.64 | 0.002 | 0.87 | -   | NM_133350    | 5 [31,117,127-31,168,432 F]    |
| <i>Ahnak</i>            | 1.63 | 0.023 | 0.90 | -   | NM_009643    | 19 [9,063,774-9,151,409 F]     |
| <i>Ihpk2</i>            | 1.63 | 0.018 | 0.84 | -   | NM_029634    | 9 [108,698,325-108,708,663 F]  |
| <i>Srrm2</i>            | 1.62 | 0.005 | 0.86 | -   | NM_175229    | 17 [23,940,154-23,961,706 F]   |
| <i>Armcx2</i>           | 1.60 | 0.014 | 0.86 | -   | NM_026139    | X [131,338,684-131,343,535 R]  |
| <i>Igf2</i>             | 1.60 | 0.041 | 0.83 | -   | NM_010514    | 7 [149,836,673-149,852,721 R]  |
| <i>Il17rd</i>           | 1.60 | 0.033 | 0.86 | -   | NM_134437    | 14 [27,852,187-27,920,472 F]   |
| <i>Pmp22</i>            | 1.60 | 0.036 | 0.83 | -   | NM_008885    | 11 [62,942,484-62,973,048 F]   |
| <i>Rev3l</i>            | 1.59 | 0.007 | 0.90 | -   | NM_011264    | 10 [39,451,966-39,595,012 F]   |
| <i>Igf1r (2)</i>        | 1.59 | 0.009 | 0.86 | -   | NM_010513    | 7 [75,097,143-75,378,553 F]    |
| <i>Malat1/Neat2 (2)</i> | 1.59 | 0.005 | 0.90 | -   | NR_002847    | 19 [5,796,214-5,796,614 F]     |
| <i>Fbn1</i>             | 1.58 | 0.010 | 0.83 | -   | NM_007993    | 2 [125,126,330-125,333,729 R]  |
| <i>Sdccag33</i>         | 1.58 | 0.031 | 0.82 | -   | XM_129060    | 18 [83,653,127-84,255,954 R]   |
| <i>Ctsf</i>             | 1.58 | 0.029 | 0.83 | -   | NM_019861    | 19 [4,855,129-4,860,912 F]     |
| <i>mt-Cytb (2)</i>      | 1.57 | 0.001 | 0.90 | -   | AB125774     | MT [14,145-15,288 F]           |
| <i>Amoil1</i>           | 1.56 | 0.025 | 0.86 | -   | NM_001081395 | 9 [14,346,410-14,419,444 R]    |
| <i>Ndst1</i>            | 1.55 | 0.008 | 0.86 | -   | NM_008306    | 18 [60,845,632-60,908,304 R]   |
| <i>Col4a1 (2)</i>       | 1.54 | 0.009 | 0.88 | -   | NM_009931    | 8 [11,198,433-11,312,748 R]    |
| <i>Rpl38</i>            | 1.54 | 0.023 | 0.82 | -   | NM_023372    | 11 [114,529,862-114,533,645 F] |
| <i>mt-Atp6</i>          | 1.52 | 0.019 | 0.83 | -   | AF093677     | MT [7,927-8,607 F]             |

|                 |      |       |      |   |           |                                |
|-----------------|------|-------|------|---|-----------|--------------------------------|
| <i>Lamc1</i>    | 1.52 | 0.010 | 0.86 | - | NM_010683 | 1 [155,066,053-155,179,916 R]  |
| <i>S100a11</i>  | 1.52 | 0.033 | 0.84 | - | NM_016740 | 3 [93,324,417-93,330,209 F]    |
| <i>Rhoj</i>     | 1.52 | 0.032 | 0.85 | - | NM_023275 | 12 [76,409,309-76,502,006 F]   |
| <i>Rhbdf1</i>   | 1.52 | 0.015 | 0.86 | - | NM_010117 | 11 [32,109,587-32,122,280 R]   |
| <i>D4Wsu53e</i> | 1.52 | 0.045 | 0.81 | - | NM_023665 | 4 [134,479,540-134,483,285 F]  |
| <i>Rpl12</i>    | 1.51 | 0.013 | 0.86 | - | NM_009076 | 2 [32,817,239-32,819,563 F]    |
| <i>Atad4</i>    | 1.50 | 0.006 | 0.83 | - | NM_146026 | 11 [96,790,616-96,796,962 F]   |
| <i>Timp2</i>    | 1.50 | 0.037 | 0.86 | - | NM_011594 | 11 [118,164,905-118,216,639 R] |
| <i>Ppp2r2b</i>  | 1.50 | 0.007 | 0.86 | - | NM_028392 | 18 [42,797,293-43,218,894 R]   |

<sup>a</sup> Genes found deregulated by both t-test and Patterns from Gene Expression (PaGE) analyses are shown. Only genes with a *P* value  $\leq 0.05$  (t-test) and a PaGE confidence interval  $\geq 0.08$  (False Discovery Rate of 20%) were called differentially expressed. All microarray values are presented as the ratio of the median expression fold changes for TgPWS and WT. The data is sorted by fold change ( $\geq 1.5$ ) in decreasing format first for down-regulated genes and then for up-regulated genes. A total of 62 genes were called up-regulated and 3 genes were down-regulated in TgPWS compared with WT pancreas. The numbers in parentheses indicate the number of times a particular transcript spotted several times on the array was found significantly deregulated with a fold change  $\geq 1.5$  by both t-test and PaGE; for clarity, only the replicate with the largest fold-change is shown in this Table. The quantitative (Q)RT-PCR expression data is also summarized (-, not tested), as are the chromosome locations and orientation (F, forward; R, reverse) of the deregulated genes.

<sup>b</sup> *Ndn* is within the TgPWS deletion interval and is not expressed in TgPWS tissues by standard RT-PCR (1; data not shown).

## Reference

1. **Stefan M, Portis T, Longnecker R, Nicholls RD.** A nonimprinted Prader-Willi Syndrome (PWS)-region gene regulates a different chromosomal domain in *trans* but the imprinted PWS loci do not alter genome-wide mRNA levels. *Genomics* 85: 630-640, 2005.

Figure S1

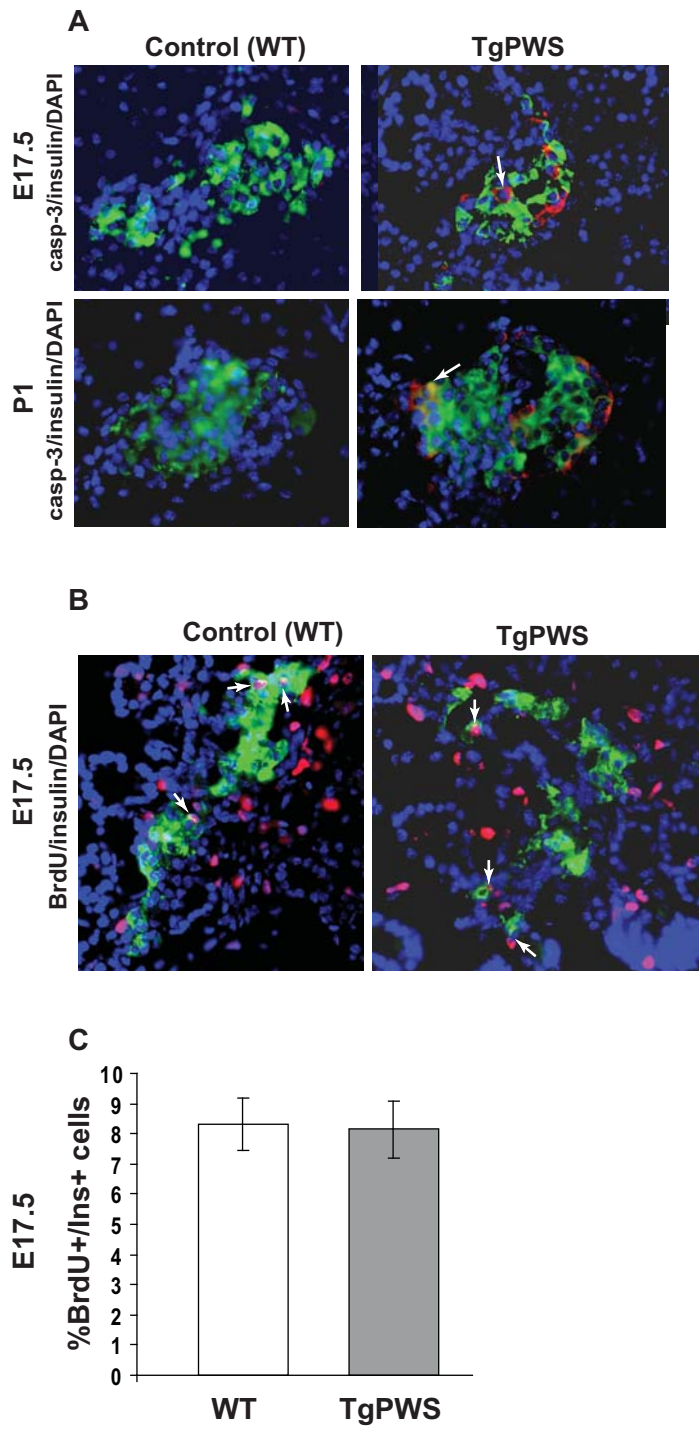

Supplement: supp_00185.2010_suppdata.pdf [file supp_00185.2010_suppdata.pdf]
